# Supplementary material for: Spatially Explicit Analysis of Genome-Wide SNPs Detects Subtle Population Structure in a Mobile Marine Mammal, the Harbor Porpoise
Source: PLoS One. 2016 Oct 26;11(10):e0162792. doi: 10.1371/journal.pone.0162792 (PMC5082642; doi:10.1371/journal.pone.0162792)
Supplement: S1 File — (STR) [file pone.0162792.s004.str]

		P104	P130	P131	P137	P142	GATA053	Lgf1	EV94	Tex3	KWM12a	MK6	MK8	MK
1	1	143	176	181	120	143	264	140	196	219	173	150	102	188
1	1	163	178	191	120	143	264	140	196	221	173	150	104	188
2	1	163	176	191	118	135	264	138	194	219	173	146	102	188
2	1	167	180	191	120	143	264	154	196	219	173	150	106	192
3	1	161	176	181	118	135	264	152	196	219	173	150	102	188
3	1	163	178	189	118	135	264	154	202	219	173	150	106	192
4	1	143	176	189	118	137	264	140	196	217	173	146	104	184
4	1	165	176	191	118	143	264	142	202	221	173	150	106	194
5	2	163	186	183	-9	135	264	138	196	221	175	150	102	178
5	2	169	190	193	-9	137	264	138	200	225	181	170	104	184
6	2	165	176	183	108	129	264	142	196	221	173	150	96	178
6	2	169	188	189	110	129	264	146	202	225	181	160	102	184
7	2	161	172	183	126	139	264	142	202	219	175	150	100	184
7	2	167	184	193	130	151	264	144	204	221	181	150	102	186
8	3	143	178	189	118	135	264	140	200	219	171	160	94	176
8	3	169	184	195	120	151	264	144	204	225	171	170	96	188
9	3	163	172	181	108	135	264	136	200	219	175	146	106	190
9	3	169	178	189	114	137	264	136	202	221	179	148	108	194
10	3	163	176	183	112	135	264	142	202	207	173	148	102	186
10	3	165	184	189	118	149	264	150	204	221	173	166	108	188
11	3	161	174	189	116	137	264	140	204	213	173	148	98	180
11	3	171	190	191	124	143	264	146	204	219	179	152	106	186
12	3	165	176	189	110	135	264	140	196	221	171	148	92	180
12	3	173	190	195	110	153	264	152	196	225	179	148	104	188
13	3	161	178	183	120	131	264	148	196	217	173	148	98	174
13	3	163	192	189	122	155	264	152	198	217	181	148	102	178
14	4	159	176	183	118	137	264	138	196	223	169	168	96	176
14	4	169	176	189	128	147	268	144	200	223	171	168	104	180
15	4	167	178	189	116	143	264	144	206	223	177	146	104	186
15	4	167	192	191	118	155	264	144	208	225	179	168	108	194
16	4	157	190	185	118	135	264	140	198	217	177	148	104	182
16	4	165	198	187	118	137	264	140	198	223	177	152	108	186
17	4	163	174	189	118	135	264	136	198	219	177	148	104	182
17	4	167	178	197	122	139	264	136	208	219	177	156	104	186
18	4	167	174	183	112	133	264	140	196	223	173	146	100	186
18	4	169	190	185	116	135	264	148	200	227	177	148	100	188
19	5	163	176	181	102	135	264	142	196	221	179	146	94	170
19	5	163	182	189	110	139	264	152	202	225	179	146	102	170
20	5	161	178	181	118	131	264	140	204	221	173	146	104	184
20	5	167	182	185	120	145	264	142	204	225	175	166	104	186
21	5	163	170	185	104	137	264	140	198	227	177	146	94	178
21	5	165	176	191	110	151	264	148	202	227	177	160	102	190
22	5	163	178	187	112	129	264	138	202	221	177	148	100	178
22	5	173	184	191	112	133	264	142	206	227	177	168	102	186
23	5	165	178	185	110	135	264	142	200	223	173	146	100	190
23	5	169	178	191	116	135	264	146	200	225	173	148	100	190
24	5	167	178	187	118	133	264	144	198	221	177	150	102	176
24	5	167	178	197	122	151	264	148	202	223	177	152	106	178
25	6	143	176	183	118	133	264	140	200	221	173	146	100	186
25	6	169	184	189	122	145	264	140	200	225	173	146	102	192
26	6	161	176	185	104	135	264	142	202	221	177	146	102	174
26	6	161	186	189	118	147	264	150	202	225	179	168	106	194
27	6	163	184	181	104	143	264	138	196	221	179	146	102	180
27	6	165	186	185	124	153	264	146	196	233	179	146	104	186
28	6	143	170	181	102	135	264	136	200	221	177	146	102	178
28	6	159	184	185	110	143	264	144	202	221	179	166	108	184
29	6	143	176	185	116	135	264	140	202	221	167	166	102	184
29	6	167	182	185	118	149	264	142	202	221	181	170	102	186
30	6	167	176	183	116	135	262	142	196	227	173	148	100	186
30	6	167	178	189	116	145	264	150	208	227	175	148	102	188
31	6	157	176	183	110	137	264	140	200	227	167	148	104	188
31	6	171	178	189	124	153	264	146	208	227	177	148	110	188
32	6	-9	176	185	112	149	264	138	204	221	175	146	102	188
32	6	-9	176	191	114	149	268	144	204	221	177	146	104	194
33	6	143	176	185	102	135	264	142	202	225	175	146	102	184
33	6	167	178	191	116	135	268	144	204	225	179	148	106	186
34	6	165	170	189	106	135	264	140	200	219	167	146	100	184
34	6	165	182	195	114	143	264	146	200	221	177	168	104	194
35	7	163	184	183	106	135	264	136	200	219	175	148	104	178
35	7	165	184	189	106	151	264	150	202	223	175	168	104	194
36	7	163	172	181	116	145	264	144	200	221	179	146	102	178
36	7	165	178	191	118	145	264	146	202	225	181	146	110	184
37	7	165	182	189	106	135	264	142	200	215	175	146	104	186
37	7	167	184	189	124	145	264	150	202	219	179	146	104	188
38	7	163	170	181	106	135	264	142	196	219	169	146	100	188
38	7	167	176	189	124	143	264	148	200	225	173	148	104	188
39	7	165	176	189	106	145	264	142	202	223	173	146	104	186
39	7	165	182	189	114	151	264	142	202	223	175	160	110	194
40	7	167	178	189	106	131	264	136	196	221	175	168	100	170
40	7	171	180	191	118	151	264	142	202	229	175	170	102	178
41	7	165	170	185	116	135	264	142	202	219	177	146	102	170
41	7	169	182	185	120	145	264	152	204	225	179	146	102	186
42	7	159	176	185	110	129	264	142	204	227	173	146	94	170
42	7	165	176	185	114	135	264	142	208	227	179	148	102	184
43	7	143	176	183	118	129	264	130	196	219	177	148	102	178
43	7	159	182	189	118	145	264	150	204	225	179	168	104	184
44	7	157	176	185	116	135	264	138	196	221	177	146	90	184
44	7	167	200	185	124	135	264	140	204	221	181	160	106	184
