# Supplementary material for: Spatially Explicit Analysis of Genome-Wide SNPs Detects Subtle Population Structure in a Mobile Marine Mammal, the Harbor Porpoise
Source: PLoS One. 2016 Oct 26;11(10):e0162792. doi: 10.1371/journal.pone.0162792 (PMC5082642; doi:10.1371/journal.pone.0162792)
Supplement: S2 File — (FASTA) [file pone.0162792.s005.fasta]

>Sample1|Pho50|WBS
AGCCCATTGTATGATTATTAAAGCACCACTGTACTATGCCAGTATTAAAAATAACCCGCTCCGAAACATCCCACTGCAACTACCATGTATGTACTCACATACTACAATCCTAGTCTTCCCCTATAAATATTTATGTATACATGCTATGTATTATTGTGCATTCATTTATTTTCCATACGACTATGTTAAAGCCCGTATTAAAACTTATTAATCTTACAAAGTACATAATTTGCACGCTCTTACATATTATATCTCCACTTGTACCTCATATCCATTATATCCTATGGCCGCTCCATTAGATCACGAGCTTAATCACCATGCCGCGTGAAACCAGCAACCCGCTTGGCAGGGATCCCCCTTCTCGCACCGGGCCCATAATCCGTGGG
>Sample2|Pho50|WBS
AGCCCATTGTATGATTATTAAAGCACCACTGTACTATGCCAGTATTAAAAATAACCCGCTCCGAAACATCCCACTGCAACTACCATGTATGTACTCACATACTACAATCCTAGTCTTCCCCTATAAATATTTATGTATACATGCTATGTATTATTGTGCATTCATTTATTTTCCATACGACTATGTTAAAGCCCGTATTAAAACTTATTAATCTTACAAAGTACATAATTTGCACGCTCTTACATATTATATCTCCACTTGTACCTCATATCCATTATATCCTATGGCCGCTCCATTAGATCACGAGCTTAATCACCATGCCGCGTGAAACCAGCAACCCGCTTGGCAGGGATCCCCCTTCTCGCACCGGGCCCATAATCCGTGGG
>Sample3|Pho50|WBS
AGCCCATTGTATGATTATTAAAGCACCACTGTACTATGCCAGTATTAAAAATAACCCGCTCCGAAACATCCCACTGCAACTACCATGTATGTACTCACATACTACAATCCTAGTCTTCCCCTATAAATATTTATGTATACATGCTATGTATTATTGTGCATTCATTTATTTTCCATACGACTATGTTAAAGCCCGTATTAAAACTTATTAATCTTACAAAGTACATAATTTGCACGCTCTTACATATTATATCTCCACTTGTACCTCATATCCATTATATCCTATGGCCGCTCCATTAGATCACGAGCTTAATCACCATGCCGCGTGAAACCAGCAACCCGCTTGGCAGGGATCCCCCTTCTCGCACCGGGCCCATAATCCGTGGG
>Sample4|Pho51|WBS
AGCCCATTGTATGATTATTAAAGCACCACTGTACTATGCCAGTATTAAAAATAACCCGCTCCGAAACATCCCACTGCAACTACCATGTATGTACTCACATACTACAATCCTAGTCTTCCCCTATAAATATTTATGTATACATGCTATGTATTATTGTGCATTCATTTATTTTCCATACGACTATGTTAAAGCCCGTATTAAAACTTATTAATCTTACAAAGCACATAATTTGCACGCTCTTACATATTATATCTCCACTTGTACCTCATATCCATTATATCCTATGGCCGCTCCATTAGATCACGAGCTTAATCACCATGCCGCGTGAAACCAGCAACCCGCTTGGCAGGGATCCCCCTTCTCGCACCGGGCCCATAATCCGTGGG
>Sample5|Pho7|ICE
AGCCCATTGTATAATTATTAAAGCACTACTGTACTATGCCAGTATCAAAAATAACCCGCCCCGAAACATCCCACTGCAACTACCATGTATGTACTCACATACTACGATCCTAGTCTTCCCCTATAAATATTTATGTATACATGCTATGTATTATTGTGCATTCATTTATTTTCCATACGACTATGTTAAAGCCCGTATTAAAACTTATTAATCTTACAAAATACATAATTTGCACGCTCTTACATATTATATCTCCACTTGTACCTCATATCCATTATATCCTATGGCCGCTCCATTAGATCACGAGCTTAATCACCATGCCGCGTGAAACCAGCAACCCGCTTAGCAAGGATCCCTCTTCTCGCACCGGGCCCATAACTCGTGGG
>Sample6|Pho52|ICE
GCCCATTGTATGATTATTAAAGCACTACTGTACTATGCCAGTATTAAAAATAACCCGCTCCGAAACATCCCACTGCAACTACCATGTATGTACTCACATACTACGATCCTAGTCTTCCCCTATAAATATTTATGTATACATGCTATGTATTATTGTGCATTCATTTATTTTCCATACGACTATGTTAAAGCCCGTATTAAAACTTATTAATCTTACAAAATACATAATTTGCACGCTCTTACATATTATATCTCCACTTGTACCTCATATCCATTATATCCTATGGCCGCTCCATTAGATCACGAGCTTAATCACCATGCCGCGTGAAACCAGCAACCCGCTTGGCAGGGATCCCTCTTCTCGCACCGGGCCCATAACTCGTGGG
>Sample7|Pho7|ICE
AGCCCATTGTATAATTATTAAAGCACTACTGTACTATGCCAGTATCAAAAATAACCCGCCCCGAAACATCCCACTGCAACTACCATGTATGTACTCACATACTACGATCCTAGTCTTCCCCTATAAATATTTATGTATACATGCTATGTATTATTGTGCATTCATTTATTTTCCATACGACTATGTTAAAGCCCGTATTAAAACTTATTAATCTTACAAAATACATAATTTGCACGCTCTTACATATTATATCTCCACTTGTACCTCATATCCATTATATCCTATGGCCGCTCCATTAGATCACGAGCTTAATCACCATGCCGCGTGAAACCAGCAACCCGCTTAGCAAGGATCCCTCTTCTCGCACCGGGCCCATAACTCGTGGG
>Sample8|Pho1|NOS
AGCCCATTGTATAATTATTAAAGCACTACTGTACTATGCCAGTATCAAAAATAACCCGCCCCGAAACATCCCACTGCAACTACCATGTATGTACTCACATACTACGATCCTAGTCTTCCCCTATAAATATTTATGTATACATGCTATGTATTATTGTGCATTCATTTATTTTCCATACGACTATGTTAAAGCCCGTATTAAAACTTATTAATCTTACAAAATACATAATTTGCACGCTCTTACATATTATATCTCCACTTGTACCTCATATCCATTATATCCTATGGCCGCTCCATTAGATCACGAGCTTAATCACCATGCCGCGTGAAACCAGCAACCCGCTTAGCAGGGATCCCTCTTCTCGCACCGGGCCCATAACTCGTGGG
>Sample9|Pho4|NOS
AGCCCATTGTATGATTATTAAAGCACTACTGTACTATGCCAGTATTAAAAATAACCCGCCCCGAAACATCCCACTGCAACTACCATGTATGTACTCACATACTACGATCCTAGTCTTCCCCTATAAATATTTATGTATACATGCTATGTATTATTGTGCATTCATTTATTTTCCATACGACTATGTTAAAGTCCGTATTAAAACTTATTAATCTTACAAAATACATAATTTGCACGCTCTTACATATTATATCTCCACTTGTACCTCATATCCATTATATCCTATGGCCGCTCCATTAGATCACGAGCTTAATCACCATGCCGCGTGAAACCAGCAACCCGCTTAGCAGGGATCCCTCTTCTCGCACCGGGCCCATAACTCGTGGG
>Sample10|Pho1|NOS
AGCCCATTGTATAATTATTAAAGCACTACTGTACTATGCCAGTATCAAAAATAACCCGCCCCGAAACATCCCACTGCAACTACCATGTATGTACTCACATACTACGATCCTAGTCTTCCCCTATAAATATTTATGTATACATGCTATGTATTATTGTGCATTCATTTATTTTCCATACGACTATGTTAAAGCCCGTATTAAAACTTATTAATCTTACAAAATACATAATTTGCACGCTCTTACATATTATATCTCCACTTGTACCTCATATCCATTATATCCTATGGCCGCTCCATTAGATCACGAGCTTAATCACCATGCCGCGTGAAACCAGCAACCCGCTTAGCAGGGATCCCTCTTCTCGCACCGGGCCCATAACTCGTGGG
>Sample11|Pho4|NOS
AGCCCATTGTATGATTATTAAAGCACTACTGTACTATGCCAGTATTAAAAATAACCCGCCCCGAAACATCCCACTGCAACTACCATGTATGTACTCACATACTACGATCCTAGTCTTCCCCTATAAATATTTATGTATACATGCTATGTATTATTGTGCATTCATTTATTTTCCATACGACTATGTTAAAGTCCGTATTAAAACTTATTAATCTTACAAAATACATAATTTGCACGCTCTTACATATTATATCTCCACTTGTACCTCATATCCATTATATCCTATGGCCGCTCCATTAGATCACGAGCTTAATCACCATGCCGCGTGAAACCAGCAACCCGCTTAGCAGGGATCCCTCTTCTCGCACCGGGCCCATAACTCGTGGG
>Sample12|Pho1|NOS
AGCCCATTGTATAATTATTAAAGCACTACTGTACTATGCCAGTATCAAAAATAACCCGCCCCGAAACATCCCACTGCAACTACCATGTATGTACTCACATACTACGATCCTAGTCTTCCCCTATAAATATTTATGTATACATGCTATGTATTATTGTGCATTCATTTATTTTCCATACGACTATGTTAAAGCCCGTATTAAAACTTATTAATCTTACAAAATACATAATTTGCACGCTCTTACATATTATATCTCCACTTGTACCTCATATCCATTATATCCTATGGCCGCTCCATTAGATCACGAGCTTAATCACCATGCCGCGTGAAACCAGCAACCCGCTTAGCAGGGATCCCTCTTCTCGCACCGGGCCCATAACTCGTGGG
>Sample13|Pho4|NOS
AGCCCATTGTATGATTATTAAAGCACTACTGTACTATGCCAGTATTAAAAATAACCCGCCCCGAAACATCCCACTGCAACTACCATGTATGTACTCACATACTACGATCCTAGTCTTCCCCTATAAATATTTATGTATACATGCTATGTATTATTGTGCATTCATTTATTTTCCATACGACTATGTTAAAGTCCGTATTAAAACTTATTAATCTTACAAAATACATAATTTGCACGCTCTTACATATTATATCTCCACTTGTACCTCATATCCATTATATCCTATGGCCGCTCCATTAGATCACGAGCTTAATCACCATGCCGCGTGAAACCAGCAACCCGCTTAGCAGGGATCCCTCTTCTCGCACCGGGCCCATAACTCGTGGG
>Sample14|Pho1|SK1
AGCCCATTGTATGATTATTAAAGCACTACTGTACTATGCCAGTATTAAAAATAACCCGCCCCGAAACATCCCACTGCAACTACCATGTATGTACTCACATACTACGATCCTAGTCTTCCCCTATAAATATTTATGTATACATGCTATGTATTATTGTGCATTCATTTATTTTCCATACGACTATGTTAAAGTCCGTATTAAAACTTATTAATCTTACAAAATACATAATTTGCACGCTCTTACATATTATATCTCCACTTGTACCTCATATCCATTATATCCTATGGCCGCTCCATTAGATCACGAGCTTAATCACCATGCCGCGTGAAACCAGCAACCCGCTTAGCAGGGATCCCTCTTCTCGCACCGGGCCCATAACTCGTGGG
>Sample15|Pho10|SK1
AGCCCATTGTATAATTATTAAAGCACTACTGTACTATGCCAGTATCAAAAATAACCCGCCCCGAAACATCCCACTGCAACTACCATGTATGTACTCACATACTACGATCCTAGTCTTCCCCTATAAATATTTATGTATACATGCTATGTATTATTGTGCATTCATTTATTTTCCATACGACTATATTAAAGCCCGTATTAAAACTTATTAATCTTACAAAATACATAATTTGCACGCTCTTACATATTATATCTCCACTTGTACCTCATATCCATTATATCCTATGGCCGCTCCATTAGATCACGAGCTTAATCACCATGCCGCGTGAAACCAGCAACCCGCTTAGCAGGGATCCCTCTTCTCGCACCGGGCCCATAACTCGTGGG
>Sample16|Pho1|SK1
AGCCCATTGTATGATTATTAAAGCACTACTGTACTATGCCAGTATTAAAAATAACCCGCCCCGAAACATCCCACTGCAACTACCATGTATGTACTCACATACTACGATCCTAGTCTTCCCCTATAAATATTTATGTATACATGCTATGTATTATTGTGCATTCATTTATTTTCCATACGACTATGTTAAAGTCCGTATTAAAACTTATTAATCTTACAAAATACATAATTTGCACGCTCTTACATATTATATCTCCACTTGTACCTCATATCCATTATATCCTATGGCCGCTCCATTAGATCACGAGCTTAATCACCATGCCGCGTGAAACCAGCAACCCGCTTAGCAGGGATCCCTCTTCTCGCACCGGGCCCATAACTCGTGGG
>Sample17|Pho1|SK1
AGCCCATTGTATAATTATTAAAGCACTACTGTACTATGCCAGTATCAAAAATAACCCGCCCCGAAACATCCCACTGCAACTACCATGTATGTACTCACATACTACGATCCTAGTCTTCCCCTATAAATATTTATGTATACATGCTATGTATTATTGTGCATTCATTTATTTTCCATACGACTATGTTAAAGCCCGTATTAAAACTTATTAATCTTACAAAATACATAATTTGCACGCTCTTACATATTATATCTCCACTTGTACCTCATATCCATTATATCCTATGGCCGCTCCATTAGATCACGAGCTTAATCACCATGCCGCGTGAAACCAGCAACCCGCTTAGCAGGGATCCCTCTTCTCGCACCGGGCCCATAACTCGTGGG
>Sample18|Pho7|SK1
AGCCCATTGTATAATTATTAAAGCACTACTGTACTATGCCAGTATCAAAAATAACCCGCCCCGAAACATCCCACTGCAACTACCATGTATGTACTCACATACTACGATCCTAGTCTTCCCCTATAAATATTTATGTATACATGCTATGTATTATTGTGCATTCATTTATTTTCCATACGACTATGTTAAAGCCCGTATTAAAACTTATTAATCTTACAAAATACATAATTTGCACGCTCTTACATATTATATCTCCACTTGTACCTCATATCCATTATATCCTATGGCCGCTCCATTAGATCACGAGCTTAATCACCATGCCGCGTGAAACCAGCAACCCGCTTAGCAAGGATCCCTCTTCTCGCACCGGGCCCATAACTCGTGGG
>Sample19|Pho27|SK1
AGCCCATTGTATAATTATTAAAGCACTACTGTACTATGCCAGTATCAAAAATAACCCGCCCCGAAACATCCCACTGCAACTACCATGTATGTACTCACATACTACGATCCTAGTCTTCCCCTATAAATATTTATGCATACATGCTATGTATTATTGTGCATTCATTTATTTTCCATACGACTATGTTAAAGCCCGTATTAAAACTTATTAATCTTACAAAATACATAATTTGCACGCTCTTACATATTATATCTCCACTTGTACCTCATATCCATTATATCCTATGGCCGCTCCATTAGATCACGAGCTTAATCACCATGCCGCGTGAAACCAGCAACCCGCTTAGCAGGGATCCCTCTTCTCGCACCGGGCCCATAACTCGTGGG
>Sample20|Pho7|SK1
AGCCCATTGTATAATTATTAAAGCACTACTGTACTATGCCAGTATCAAAAATAACCCGCCCCGAAACATCCCACTGCAACTACCATGTATGTACTCACATACTACGATCCTAGTCTTCCCCTATAAATATTTATGTATACATGCTATGTATTATTGTGCATTCATTTATTTTCCATACGACTATGTTAAAGCCCGTATTAAAACTTATTAATCTTACAAAATACATAATTTGCACGCTCTTACATATTATATCTCCACTTGTACCTCATATCCATTATATCCTATGGCCGCTCCATTAGATCACGAGCTTAATCACCATGCCGCGTGAAACCAGCAACCCGCTTAGCAAGGATCCCTCTTCTCGCACCGGGCCCATAACTCGTGGG
>Sample21|Pho1|SK1
AGCCCATTGTATAATTATTAAAGCACTACTGTACTATGCCAGTATCAAAAATAACCCGCCCCGAAACATCCCACTGCAACTACCATGTATGTACTCACATACTACGATCCTAGTCTTCCCCTATAAATATTTATGTATACATGCTATGTATTATTGTGCATTCATTTATTTTCCATACGACTATGTTAAAGCCCGTATTAAAACTTATTAATCTTACAAAATACATAATTTGCACGCTCTTACATATTATATCTCCACTTGTACCTCATATCCATTATATCCTATGGCCGCTCCATTAGATCACGAGCTTAATCACCATGCCGCGTGAAACCAGCAACCCGCTTAGCAGGGATCCCTCTTCTCGCACCGGGCCCATAACTCGTGGG
>Sample22|Pho7|SK1
AGCCCATTGTATAATTATTAAAGCACTACTGTACTATGCCAGTATCAAAAATAACCCGCCCCGAAACATCCCACTGCAACTACCATGTATGTACTCACATACTACGATCCTAGTCTTCCCCTATAAATATTTATGTATACATGCTATGTATTATTGTGCATTCATTTATTTTCCATACGACTATGTTAAAGCCCGTATTAAAACTTATTAATCTTACAAAATACATAATTTGCACGCTCTTACATATTATATCTCCACTTGTACCTCATATCCATTATATCCTATGGCCGCTCCATTAGATCACGAGCTTAATCACCATGCCGCGTGAAACCAGCAACCCGCTTAGCAAGGATCCCTCTTCTCGCACCGGGCCCATAACTCGTGGG
>Sample23|Pho11|SK1
AGCCCATTGTATAATTATTAAAGCACTACTGTACTATGCCAGTATCAAAAATAACCCGCCCCGAAACATCCCACTGCAACTACCATGTATGTACTCACATACTACGATCCTAGTCTTCCCCTATAAATATTTATGTATACATGCTATGTATTATTGTGCATTCATTTATTTTCCATACGACTATATTAAAGCCCGTATTAAAACTTATTAATCTTACAAAATACATAATTTGCACGCTCTTACATATTATATCTCCACTTGTACCTCATATCCATTATATCCTATGGCCGCTCCATTAGATCACGAGCTTAATCACCATGCCGCGTGAAACCAGCAACCCGCTTAGCAAGGATCCCTCTTCTCGCACCGGGCCCATAACTCGTGGG
>Sample24|Pho1|SK1
AGCCCATTGTATAATTATTAAAGCACTACTGTACTATGCCAGTATCAAAAATAACCCGCCCCGAAACATCCCACTGCAACTACCATGTATGTACTCACATACTACGATCCTAGTCTTCCCCTATAAATATTTATGTATACATGCTATGTATTATTGTGCATTCATTTATTTTCCATACGACTATGTTAAAGCCCGTATTAAAACTTATTAATCTTACAAAATACATAATTTGCACGCTCTTACATATTATATCTCCACTTGTACCTCATATCCATTATATCCTATGGCCGCTCCATTAGATCACGAGCTTAATCACCATGCCGCGTGAAACCAGCAACCCGCTTAGCAGGGATCCCTCTTCTCGCACCGGGCCCATAACTCGTGGG
>Sample25|Pho7|BES2
AGCCCATTGTATAATTATTAAAGCACTACTGTACTATGCCAGTATCAAAAATAACCCGCCCCGAAACATCCCACTGCAACTACCATGTATGTACTCACATACTACGATCCTAGTCTTCCCCTATAAATATTTATGTATACATGCTATGTATTATTGTGCATTCATTTATTTTCCATACGACTATGTTAAAGCCCGTATTAAAACTTATTAATCTTACAAAATACATAATTTGCACGCTCTTACATATTATATCTCCACTTGTACCTCATATCCATTATATCCTATGGCCGCTCCATTAGATCACGAGCTTAATCACCATGCCGCGTGAAACCAGCAACCCGCTTAGCAAGGATCCCTCTTCTCGCACCGGGCCCATAACTCGTGGG
>Sample26|Pho7|BES2
AGCCCATTGTATAATTATTAAAGCACTACTGTACTATGCCAGTATCAAAAATAACCCGCCCCGAAACATCCCACTGCAACTACCATGTATGTACTCACATACTACGATCCTAGTCTTCCCCTATAAATATTTATGTATACATGCTATGTATTATTGTGCATTCATTTATTTTCCATACGACTATGTTAAAGCCCGTATTAAAACTTATTAATCTTACAAAATACATAATTTGCACGCTCTTACATATTATATCTCCACTTGTACCTCATATCCATTATATCCTATGGCCGCTCCATTAGATCACGAGCTTAATCACCATGCCGCGTGAAACCAGCAACCCGCTTAGCAAGGATCCCTCTTCTCGCACCGGGCCCATAACTCGTGGG
>Sample27|Pho7|BES2
AGCCCATTGTATAATTATTAAAGCACTACTGTACTATGCCAGTATCAAAAATAACCCGCCCCGAAACATCCCACTGCAACTACCATGTATGTACTCACATACTACGATCCTAGTCTTCCCCTATAAATATTTATGTATACATGCTATGTATTATTGTGCATTCATTTATTTTCCATACGACTATGTTAAAGCCCGTATTAAAACTTATTAATCTTACAAAATACATAATTTGCACGCTCTTACATATTATATCTCCACTTGTACCTCATATCCATTATATCCTATGGCCGCTCCATTAGATCACGAGCTTAATCACCATGCCGCGTGAAACCAGCAACCCGCTTAGCAAGGATCCCTCTTCTCGCACCGGGCCCATAACTCGTGGG
>Sample28|Pho1|BES2
AGCCCATTGTATAATTATTAAAGCACTACTGTACTATGCCAGTATCAAAAATAACCCGCCCCGAAACATCCCACTGCAACTACCATGTATGTACTCACATACTACGATCCTAGTCTTCCCCTATAAATATTTATGTATACATGCTATGTATTATTGTGCATTCATTTATTTTCCATACGACTATGTTAAAGCCCGTATTAAAACTTATTAATCTTACAAAATACATAATTTGCACGCTCTTACATATTATATCTCCACTTGTACCTCATATCCATTATATCCTATGGCCGCTCCATTAGATCACGAGCTTAATCACCATGCCGCGTGAAACCAGCAACCCGCTTAGCAGGGATCCCTCTTCTCGCACCGGGCCCATAACTCGTGGG
>Sample29|Pho14|BES2
AGCCCATTGTATAATTATTAAAGCACTACTGTACTATGCCAGTATCAAAAATAACCCGCCCCGAAACATCCCACTGCAACTACCATGTATGTACTCACATACTACGATCCTAGTCTTCCCCTATAAATATTTATGTATACATGCTATGTATTATTGTGCATTCATTTATTTTCCATACGACTATGTTAAAGCCCGTATTAAAACTTATTAATCTTACAAAATACATAATTTGCATGCTCTTACATATTATATCTCCACTTGTACCTCATATCCATTATATCCTATGGCCGCTCCATTAGATCACGAGCTTAATCACCATGCCGCGTGAAACCAGCAACCCGCTTAGCAAGGATCCCTCTTCTCGCACCGGGCCCATAACTCGTGGG
>Sample30|Pho7|BES2
AGCCCATTGTATAATTATTAAAGCACTACTGTACTATGCCAGTATCAAAAATAACCCGCCCCGAAACATCCCACTGCAACTACCATGTATGTACTCACATACTACGATCCTAGTCTTCCCCTATAAATATTTATGTATACATGCTATGTATTATTGTGCATTCATTTATTTTCCATACGACTATGTTAAAGCCCGTATTAAAACTTATTAATCTTACAAAATACATAATTTGCACGCTCTTACATATTATATCTCCACTTGTACCTCATATCCATTATATCCTATGGCCGCTCCATTAGATCACGAGCTTAATCACCATGCCGCGTGAAACCAGCAACCCGCTTAGCAAGGATCCCTCTTCTCGCACCGGGCCCATAACTCGTGGG
>Sample31|Pho7|BES2
AGCCCATTGTATAATTATTAAAGCACTACTGTACTATGCCAGTATCAAAAATAACCCGCCCCGAAACATCCCACTGCAACTACCATGTATGTACTCACATACTACGATCCTAGTCTTCCCCTATAAATATTTATGTATACATGCTATGTATTATTGTGCATTCATTTATTTTCCATACGACTATGTTAAAGCCCGTATTAAAACTTATTAATCTTACAAAATACATAATTTGCACGCTCTTACATATTATATCTCCACTTGTACCTCATATCCATTATATCCTATGGCCGCTCCATTAGATCACGAGCTTAATCACCATGCCGCGTGAAACCAGCAACCCGCTTAGCAAGGATCCCTCTTCTCGCACCGGGCCCATAACTCGTGGG
>Sample32|Pho1|BES2
AGCCCATTGTATAATTATTAAAGCACTACTGTACTATGCCAGTATCAAAAATAACCCGCCCCGAAACATCCCACTGCAACTACCATGTATGTACTCACATACTACGATCCTAGTCTTCCCCTATAAATATTTATGTATACATGCTATGTATTATTGTGCATTCATTTATTTTCCATACGACTATGTTAAAGCCCGTATTAAAACTTATTAATCTTACAAAATACATAATTTGCACGCTCTTACATATTATATCTCCACTTGTACCTCATATCCATTATATCCTATGGCCGCTCCATTAGATCACGAGCTTAATCACCATGCCGCGTGAAACCAGCAACCCGCTTAGCAGGGATCCCTCTTCTCGCACCGGGCCCATAACTCGTGGG
>Sample33|Pho7|BES2
AGCCCATTGTATAATTATTAAAGCACTACTGTACTATGCCAGTATCAAAAATAACCCGCCCCGAAACATCCCACTGCAACTACCATGTATGTACTCACATACTACGATCCTAGTCTTCCCCTATAAATATTTATGTATACATGCTATGTATTATTGTGCATTCATTTATTTTCCATACGACTATGTTAAAGCCCGTATTAAAACTTATTAATCTTACAAAATACATAATTTGCACGCTCTTACATATTATATCTCCACTTGTACCTCATATCCATTATATCCTATGGCCGCTCCATTAGATCACGAGCTTAATCACCATGCCGCGTGAAACCAGCAACCCGCTTAGCAAGGATCCCTCTTCTCGCACCGGGCCCATAACTCGTGGG
>Sample34|Pho7|BES2
AGCCCATTGTATAATTATTAAAGCACTACTGTACTATGCCAGTATCAAAAATAACCCGCCCCGAAACATCCCACTGCAACTACCATGTATGTACTCACATACTACGATCCTAGTCTTCCCCTATAAATATTTATGTATACATGCTATGTATTATTGTGCATTCATTTATTTTCCATACGACTATGTTAAAGCCCGTATTAAAACTTATTAATCTTACAAAATACATAATTTGCACGCTCTTACATATTATATCTCCACTTGTACCTCATATCCATTATATCCTATGGCCGCTCCATTAGATCACGAGCTTAATCACCATGCCGCGTGAAACCAGCAACCCGCTTAGCAAGGATCCCTCTTCTCGCACCGGGCCCATAACTCGTGGG
>Sample35|Pho7|IBS
AGCCCATTGTATAATTATTAAAGCACTACTGTACTATGCCAGTATCAAAAATAACCCGCCCCGAAACATCCCACTGCAACTACCATGTATGTACTCACATACTACGATCCTAGTCTTCCCCTATAAATATTTATGTATACATGCTATGTATTATTGTGCATTCATTTATTTTCCATACGACTATGTTAAAGCCCGTATTAAAACTTATTAATCTTACAAAATACATAATTTGCACGCTCTTACATATTATATCTCCACTTGTACCTCATATCCATTATATCCTATGGCCGCTCCATTAGATCACGAGCTTAATCACCATGCCGCGTGAAACCAGCAACCCGCTTAGCAAGGATCCCTCTTCTCGCACCGGGCCCATAACTCGTGGG
>Sample36|Pho1|IBS
AGCCCATTGTATAATTATTAAAGCACTACTGTACTATGCCAGTATCAAAAATAACCCGCCCCGAAACATCCCACTGCAACTACCATGTATGTACTCACATACTACGATCCTAGTCTTCCCCTATAAATATTTATGTATACATGCTATGTATTATTGTGCATTCATTTATTTTCCATACGACTATGTTAAAGCCCGTATTAAAACTTATTAATCTTACAAAATACATAATTTGCACGCTCTTACATATTATATCTCCACTTGTACCTCATATCCATTATATCCTATGGCCGCTCCATTAGATCACGAGCTTAATCACCATGCCGCGTGAAACCAGCAACCCGCTTAGCAGGGATCCCTCTTCTCGCACCGGGCCCATAACTCGTGGG
>Sample37|Pho27|IBS
AGCCCATTGTATAATTATTAAAGCACTACTGTACTATGCCAGTATCAAAAATAACCCGCCCCGAAACATCCCACTGCAACTACCATGTATGTACTCACATACTACGATCCTAGTCTTCCCCTATAAATATTTATGCATACATGCTATGTATTATTGTGCATTCATTTATTTTCCATACGACTATGTTAAAGCCCGTATTAAAACTTATTAATCTTACAAAATACATAATTTGCACGCTCTTACATATTATATCTCCACTTGTACCTCATATCCATTATATCCTATGGCCGCTCCATTAGATCACGAGCTTAATCACCATGCCGCGTGAAACCAGCAACCCGCTTAGCAGGGATCCCTCTTCTCGCACCGGGCCCATAACTCGTGGG
>Sample38|Pho14|IBS
AGCCCATTGTATAATTATTAAAGCACTACTGTACTATGCCAGTATCAAAAATAACCCGCCCCGAAACATCCCACTGCAACTACCATGTATGTACTCACATACTACGATCCTAGTCTTCCCCTATAAATATTTATGTATACATGCTATGTATTATTGTGCATTCATTTATTTTCCATACGACTATGTTAAAGCCCGTATTAAAACTTATTAATCTTACAAAATACATAATTTGCATGCTCTTACATATTATATCTCCACTTGTACCTCATATCCATTATATCCTATGGCCGCTCCATTAGATCACGAGCTTAATCACCATGCCGCGTGAAACCAGCAACCCGCTTAGCAAGGATCCCTCTTCTCGCACCGGGCCCATAACTCGTGGG
>Sample39|Pho7|IBS
AGCCCATTGTATAATTATTAAAGCACTACTGTACTATGCCAGTATCAAAAATAACCCGCCCCGAAACATCCCACTGCAACTACCATGTATGTACTCACATACTACGATCCTAGTCTTCCCCTATAAATATTTATGTATACATGCTATGTATTATTGTGCATTCATTTATTTTCCATACGACTATGTTAAAGCCCGTATTAAAACTTATTAATCTTACAAAATACATAATTTGCACGCTCTTACATATTATATCTCCACTTGTACCTCATATCCATTATATCCTATGGCCGCTCCATTAGATCACGAGCTTAATCACCATGCCGCGTGAAACCAGCAACCCGCTTAGCAAGGATCCCTCTTCTCGCACCGGGCCCATAACTCGTGGG
>Sample40|Pho7|IBS
AGCCCATTGTATAATTATTAAAGCACTACTGTACTATGCCAGTATCAAAAATAACCCGCCCCGAAACATCCCACTGCAACTACCATGTATGTACTCACATACTACGATCCTAGTCTTCCCCTATAAATATTTATGTATACATGCTATGTATTATTGTGCATTCATTTATTTTCCATACGACTATGTTAAAGCCCGTATTAAAACTTATTAATCTTACAAAATACATAATTTGCACGCTCTTACATATTATATCTCCACTTGTACCTCATATCCATTATATCCTATGGCCGCTCCATTAGATCACGAGCTTAATCACCATGCCGCGTGAAACCAGCAACCCGCTTAGCAAGGATCCCTCTTCTCGCACCGGGCCCATAACTCGTGGG
>Sample41|Pho27|IBS
AGCCCATTGTATAATTATTAAAGCACTACTGTACTATGCCAGTATCAAAAATAACCCGCCCCGAAACATCCCACTGCAACTACCATGTATGTACTCACATACTACGATCCTAGTCTTCCCCTATAAATATTTATGCATACATGCTATGTATTATTGTGCATTCATTTATTTTCCATACGACTATGTTAAAGCCCGTATTAAAACTTATTAATCTTACAAAATACATAATTTGCACGCTCTTACATATTATATCTCCACTTGTACCTCATATCCATTATATCCTATGGCCGCTCCATTAGATCACGAGCTTAATCACCATGCCGCGTGAAACCAGCAACCCGCTTAGCAGGGATCCCTCTTCTCGCACCGGGCCCATAACTCGTGGG
>Sample42|Pho1|IBS
AGCCCATTGTATAATTATTAAAGCACTACTGTACTATGCCAGTATCAAAAATAACCCGCCCCGAAACATCCCACTGCAACTACCATGTATGTACTCACATACTACGATCCTAGTCTTCCCCTATAAATATTTATGTATACATGCTATGTATTATTGTGCATTCATTTATTTTCCATACGACTATGTTAAAGCCCGTATTAAAACTTATTAATCTTACAAAATACATAATTTGCACGCTCTTACATATTATATCTCCACTTGTACCTCATATCCATTATATCCTATGGCCGCTCCATTAGATCACGAGCTTAATCACCATGCCGCGTGAAACCAGCAACCCGCTTAGCAGGGATCCCTCTTCTCGCACCGGGCCCATAACTCGTGGG
>Sample43|Pho4|IBS
AGCCCATTGTATGATTATTAAAGCACTACTGTACTATGCCAGTATTAAAAATAACCCGCCCCGAAACATCCCACTGCAACTACCATGTATGTACTCACATACTACGATCCTAGTCTTCCCCTATAAATATTTATGTATACATGCTATGTATTATTGTGCATTCATTTATTTTCCATACGACTATGTTAAAGTCCGTATTAAAACTTATTAATCTTACAAAATACATAATTTGCACGCTCTTACATATTATATCTCCACTTGTACCTCATATCCATTATATCCTATGGCCGCTCCATTAGATCACGAGCTTAATCACCATGCCGCGTGAAACCAGCAACCCGCTTAGCAGGGATCCCTCTTCTCGCACCGGGCCCATAACTCGTGGG
>Sample44|Pho7|IBS
AGCCCATTGTATAATTATTAAAGCACTACTGTACTATGCCAGTATCAAAAATAACCCGCCCCGAAACATCCCACTGCAACTACCATGTATGTACTCACATACTACGATCCTAGTCTTCCCCTATAAATATTTATGTATACATGCTATGTATTATTGTGCATTCATTTATTTTCCATACGACTATGTTAAAGCCCGTATTAAAACTTATTAATCTTACAAAATACATAATTTGCACGCTCTTACATATTATATCTCCACTTGTACCTCATATCCATTATATCCTATGGCCGCTCCATTAGATCACGAGCTTAATCACCATGCCGCGTGAAACCAGCAACCCGCTTAGCAAGGATCCCTCTTCTCGCACCGGGCCCATAACTCGTGGG
